# Supplementary figures and images for: A dedicated visual pathway for prey detection in larval zebrafish
Source: eLife journal article supplement (doi:10.7554/elife.04878), 2014-12-09

## Figure 7 - Figure Supplement 1

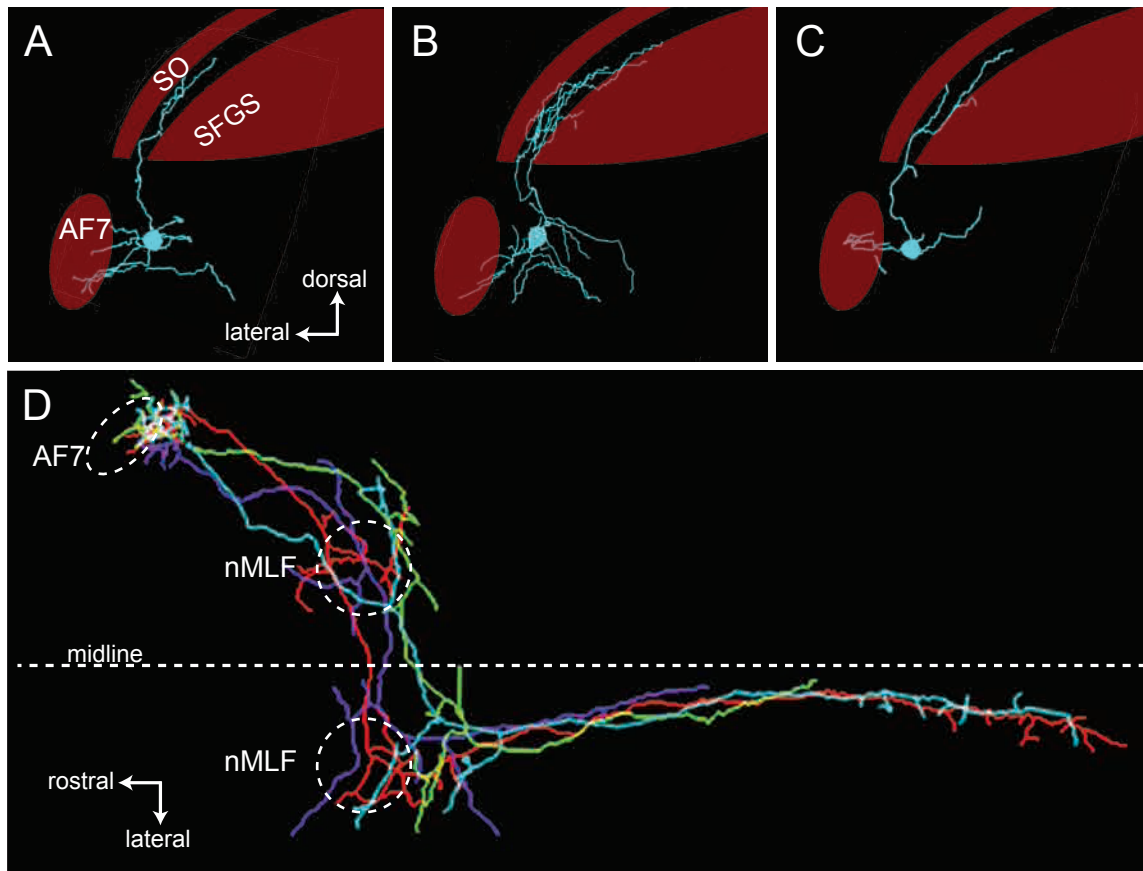

Supplement: supp [file elife-04878-supp-v1.zip]

## Figure 3 - Figure Supplement 1

A

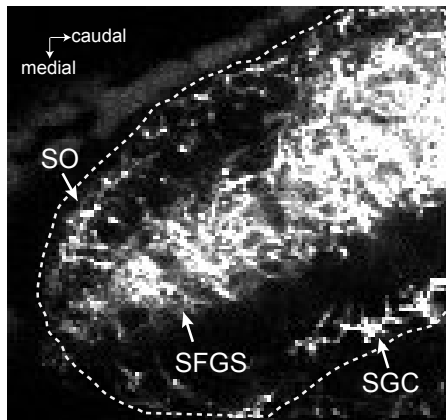

B

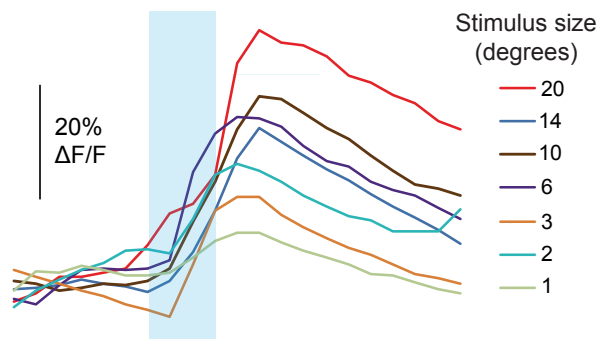

C

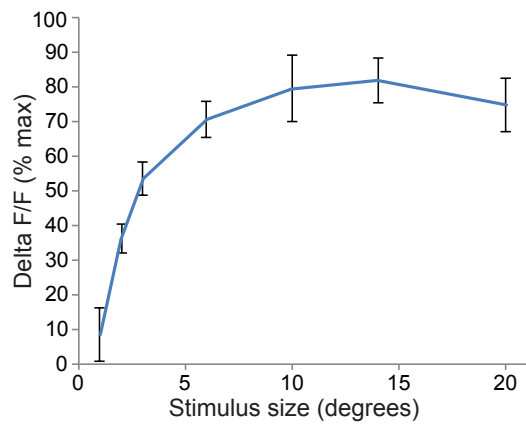

Supplement: supp [file elife-04878-supp-v1.zip]

Figure 1 - Figure Supplement 1

A

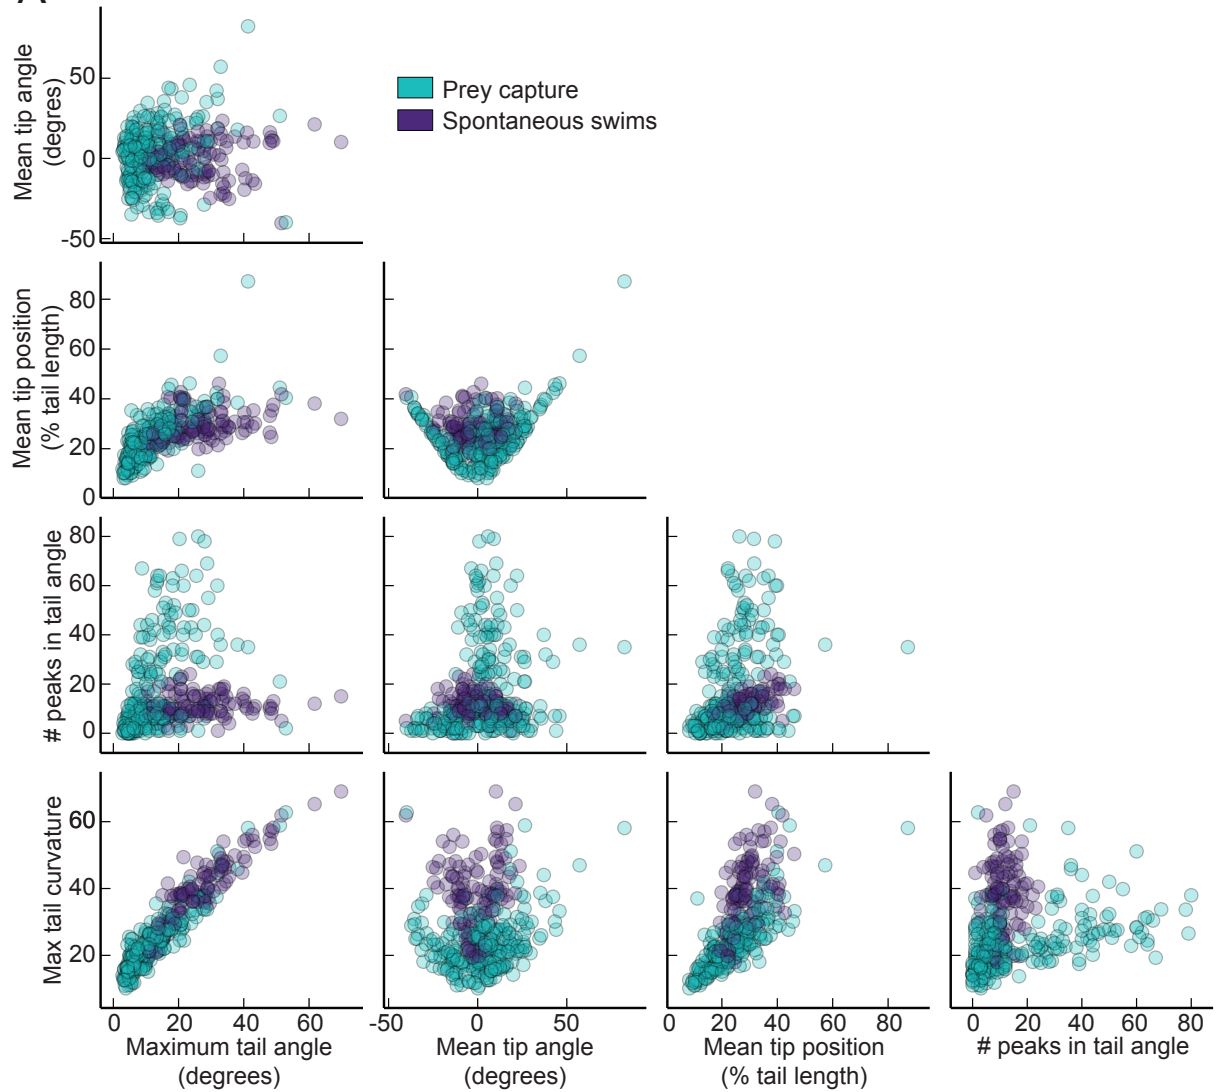

B

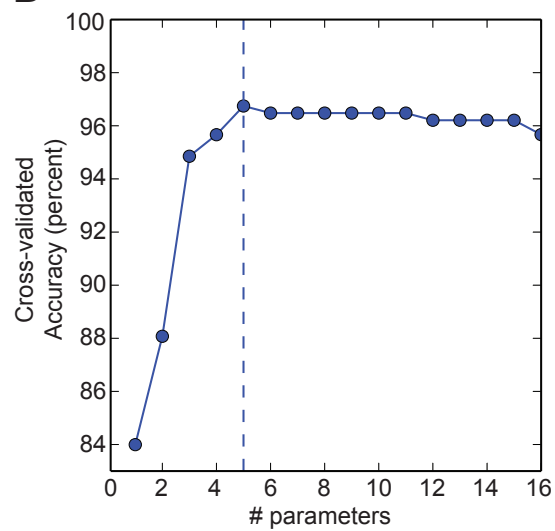

C

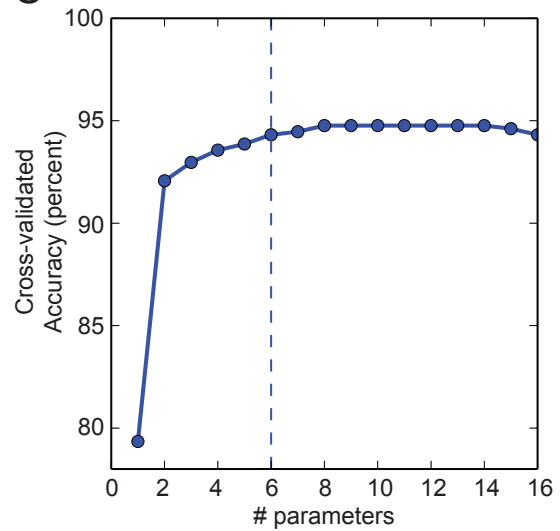

Supplement: supp [file elife-04878-supp-v1.zip]

Figure 6 - Figure Supplement 1

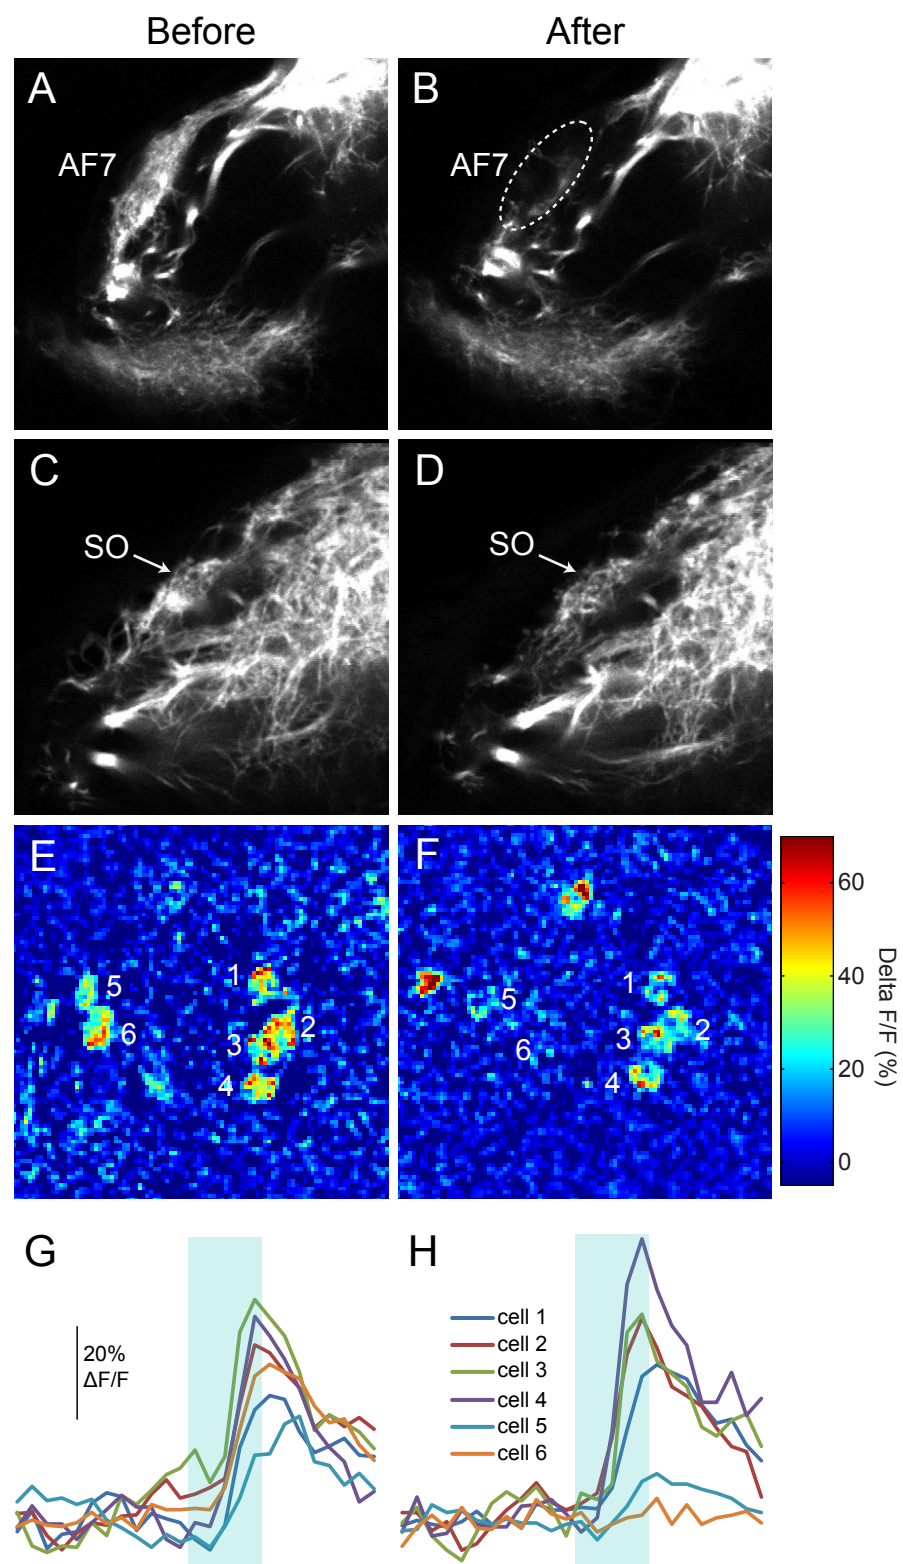

Supplement: supp [file elife-04878-supp-v1.zip]
